# Supplementary material for: Effects of Cu addition on band gap energy, density of state effective mass and charge transport properties in Bi2Te3 composites
Source: Royal Society of Chemistry journal article supplement (doi:10.1039/c4ra07134d), 2014-01-01
Supplement: c4ra07134d1.pdf [file c4ra07134d1.pdf]

Supplementary information for:

**Effects of Cu addition on band gap energy, density of state effective mass and charge transport properties in Bi<sub>2</sub>Te<sub>3</sub> composites**

Hyeon Jin Yu,<sup>‡a,b</sup> Mahn Jeong,<sup>‡,a</sup> Young Soo Lim,<sup>\*a</sup> Won-Seon Seo,<sup>a</sup> O-Jong Kwon,<sup>c</sup> Cheol-Hee Park,<sup>\*,c</sup> and Hae-Jin Hwang<sup>b</sup>

<sup>a</sup> Energy and Environmental Division, Korea Institute of Ceramic Engineering and Technology, Seoul, Republic of Korea, <sup>b</sup> LG Chem/Research Park, Daejeon, Republic of Korea, and <sup>c</sup> Division of Materials Science and Engineering, Inha University, Seoul, Republic of Korea.

<sup>‡</sup>H.J. Yu and M. Jeong contributed equally to this work

E-mail: [yslim@kicet.re.kr](mailto:yslim@kicet.re.kr) (Y.S. Lim) and [pmoka@lgchem.com](mailto:pmoka@lgchem.com) (C.-H. Park)

Figure S1. XPS Cu  $2p_{3/2}$  spectrum of  $\text{Cu}_{0.04}\text{Bi}_2\text{Te}_3$  composite.

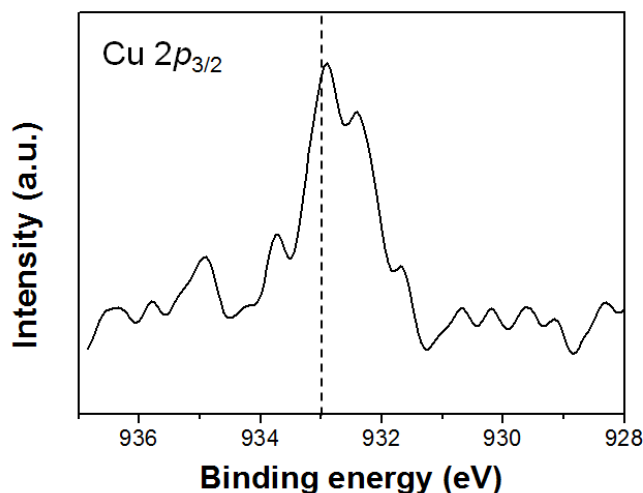

Although the XPS spectrum was not very sharp due to the small content of Cu in the composite, the binding energy exhibited a maximum peak around 933 eV and it was quite consistent to the reported values. In literature, the binding energy of Cu has been reported to be  $\sim 933$  eV regardless of its oxidation state (Cu,  $\text{Cu}_2\text{Te}$ ,  $\text{CuTe}$ ).<sup>S1-S3</sup> Especially, Teeter reported that the binding energies for  $\text{Cu}^0$ ,  $\text{Cu}^{1+}$  and  $\text{Cu}^{2+}$  were equal within about 0.05 eV.<sup>S1</sup> Although the identification of the oxidation state of the doped Cu was not possible due to the similarity in their binding energies, our result clearly reveals the existence of Cu-Te bonding in the  $\text{Cu}_x\text{Bi}_2\text{Te}_3$  composite.

## References

- S1. G. Teeter, *Appl. Phys. Lett.*, 2007, **102**, 034504.
- S2. E.P. Domashevskaya *et al.*, *J. Electron Spectrosc. Relat. Phenom.*, 2001, **114-116**, 901.
- S3. J. Carmona-Rodríguez *et al.*, *J. Mater. Chem.*, 2011, **21**, 13001.
